# Supplementary material for: Ion counting in supercapacitor electrodes using NMR spectroscopy
Source: Royal Society of Chemistry journal article supplement (doi:10.1039/c4fd00138a), 2014-01-01
Supplement: c4fd00138a1.pdf [file c4fd00138a1.pdf]

# **Ion Counting in Supercapacitor Electrodes using NMR Spectroscopy**

John M. Griffin,\*<sup>1</sup> Alexander C. Forse,<sup>1</sup> Hao Wang,<sup>1</sup> Nicole M. Trease,<sup>2</sup>

Pierre-Louis Taberna,<sup>3</sup> Patrice Simon,<sup>3</sup> and Clare P. Grey<sup>1,2</sup>

*Supporting Information*

## S1. Spectral deconvolutions: $^{19}\text{F}$ NMR adsorption study

Deconvolutions for the  $^{19}\text{F}$  NMR spectra of 4 mg pieces of YP-50F film soaked in different amounts of  $\text{NEt}_4\text{-BF}_4$  electrolyte (Figures 1a and 1c in the main text) are shown in Figure S1. Deconvolution parameters for each fitted lineshape are summarized in Table S1.

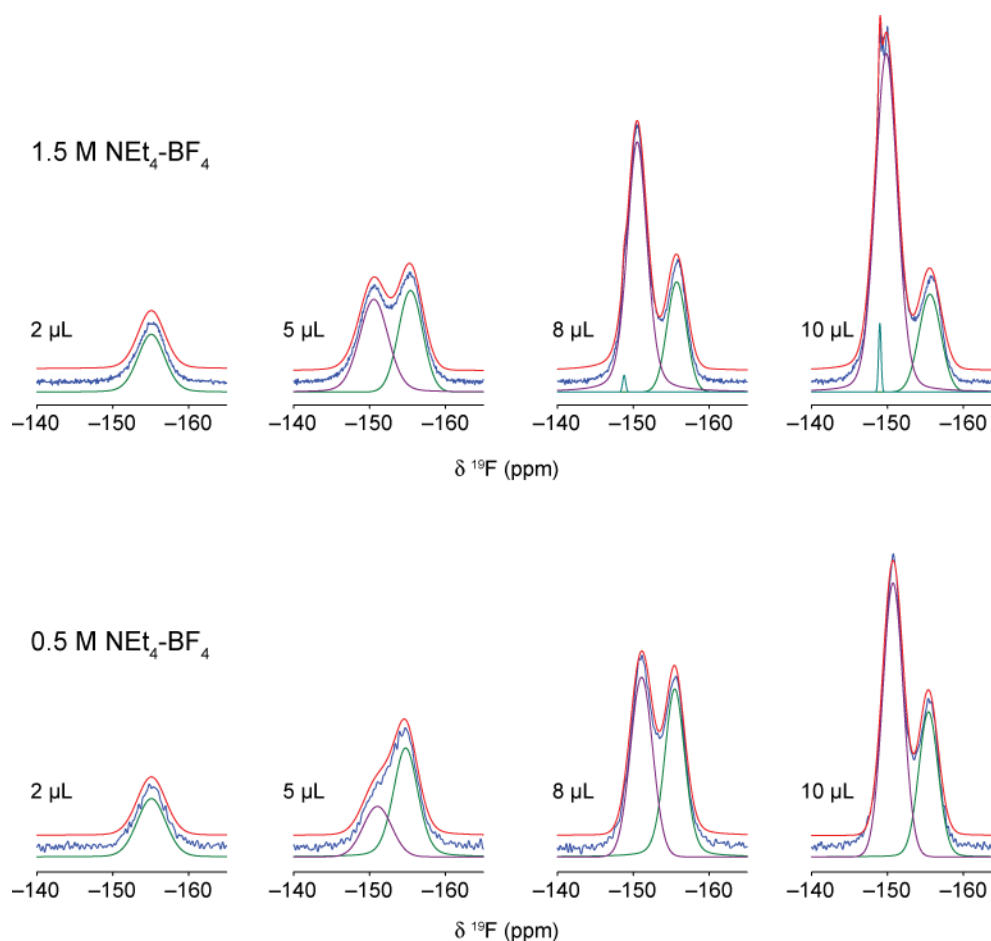

**Figure S1.** Deconvolutions of  $^{19}\text{F}$  NMR spectra recorded for 4 mg pieces of YP-50F film soaked in different amounts of  $\text{NEt}_4\text{-BF}_4$  electrolyte. Experimental lineshapes are shown in blue, individual fitted components are shown in green and purple, and the total fitted lineshape is shown in red.

**Table S1.** Deconvolution parameters for fits shown in Figure S1.

| Volume / $\mu$ L    | Resonance | Shift (ppm) | Width (ppm) | G/L ratio | Absolute integrated intensity (arb.) | Relative integrated intensity* |
|---------------------|-----------|-------------|-------------|-----------|--------------------------------------|--------------------------------|
| 1.5 M concentration |           |             |             |           |                                      |                                |
| 2                   | in-pore   | -155.09     | 4.19        | 0.83      | 62598                                | 0.16                           |
| 5                   | in-pore   | -155.40     | 3.75        | 1.00      | 92204                                | 0.24                           |
|                     | ex-pore   | -150.57     | 4.45        | 0.84      | 106621                               | 0.28                           |
| 8                   | in-pore   | -155.71     | 2.99        | 1.00      | 79599                                | 0.21                           |
|                     | ex-pore 1 | -150.51     | 3.11        | 0.69      | 212061                               | 0.55                           |
|                     | ex-pore 2 | -148.79     | 0.46        | 1.00      | 1874                                 | 0.00                           |
| 10                  | in-pore   | -155.59     | 3.40        | 1.00      | 80544                                | 0.21                           |
|                     | ex-pore 1 | -149.83     | 3.42        | 0.83      | 298478                               | 0.77                           |
|                     | ex-pore 2 | -148.99     | 0.40        | 1.00      | 6618                                 | 0.02                           |
| 0.5 M concentration |           |             |             |           |                                      |                                |
| 2                   | in-pore   | -155.10     | 4.45        | 0.25      | 24952                                | 0.21                           |
| 5                   | in-pore   | -154.76     | 3.81        | 0.77      | 41882                                | 0.35                           |
|                     | ex-pore   | -151.04     | 4.41        | 1.00      | 20341                                | 0.17                           |
| 8                   | in-pore   | -155.45     | 3.12        | 0.77      | 51856                                | 0.43                           |
|                     | ex-pore   | -151.08     | 3.44        | 1.00      | 56501                                | 0.47                           |
| 10                  | in-pore   | -155.40     | 3.02        | 0.92      | 41294                                | 0.34                           |
|                     | ex-pore   | -150.72     | 3.17        | 1.00      | 79424                                | 0.66                           |

\*Integrated intensity relative to the total intensity of the 10  $\mu$ L spectrum for each concentration.

## **S2. Spectral deconvolutions: In Situ NMR studies of supercapacitor cells**

Representative deconvolutions of  $^{19}\text{F}$  *in situ* NMR spectral recorded for cells held at 0 V are shown in Figure S2. In each case, a single component was used to model the in-pore resonance, while a minimum of 3 - 4 components were required to accurately model the ex-pore / free electrolyte feature. For Li-TFSI, more components were required owing to the more complex appearance of the ex-pore / free electrolyte feature.

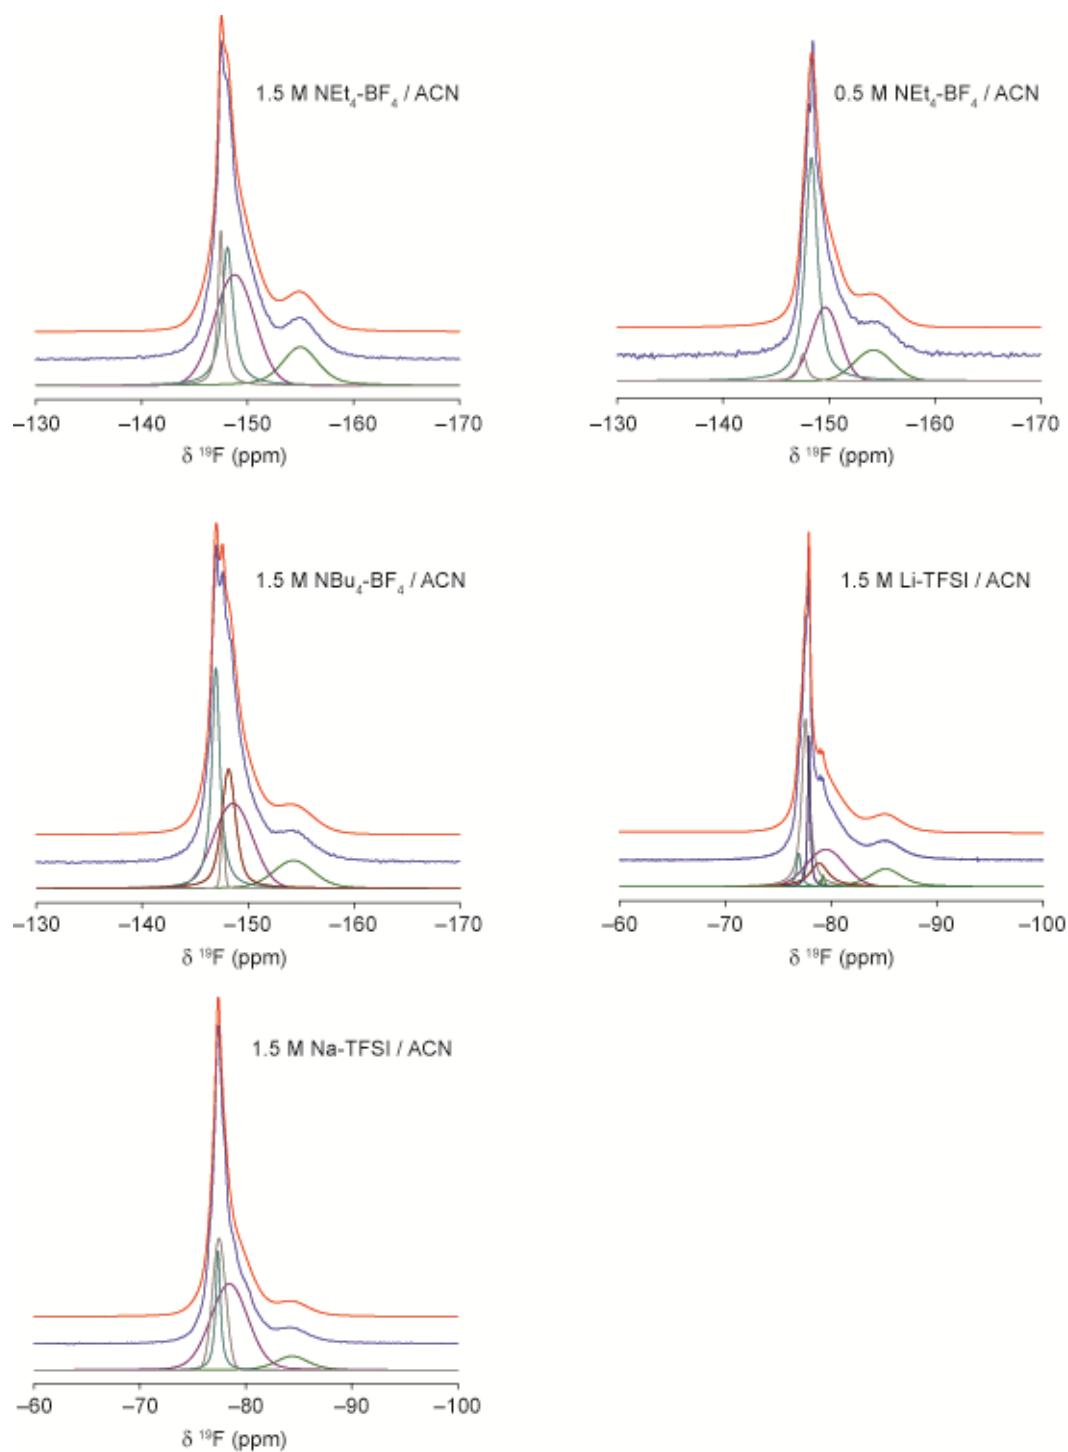

**Figure S2.** Representative deconvolutions of  $^{19}\text{F}$  in situ NMR spectra recorded for cells held at 0 V. Experimental lineshapes are shown in blue, while the sum of individual fitted components is shown in red.

### S3. Charge stored during *in situ* NMR experiments

Figure S3 shows the cumulative charge stored for each cell at each voltage step in the  $^{19}\text{F}$  *in situ* NMR experiments. The stored charge varies approximately linearly with the applied cell voltage in each case and is fully discharged during the  $1.5\text{ V} \rightarrow 0\text{ V}$  step.

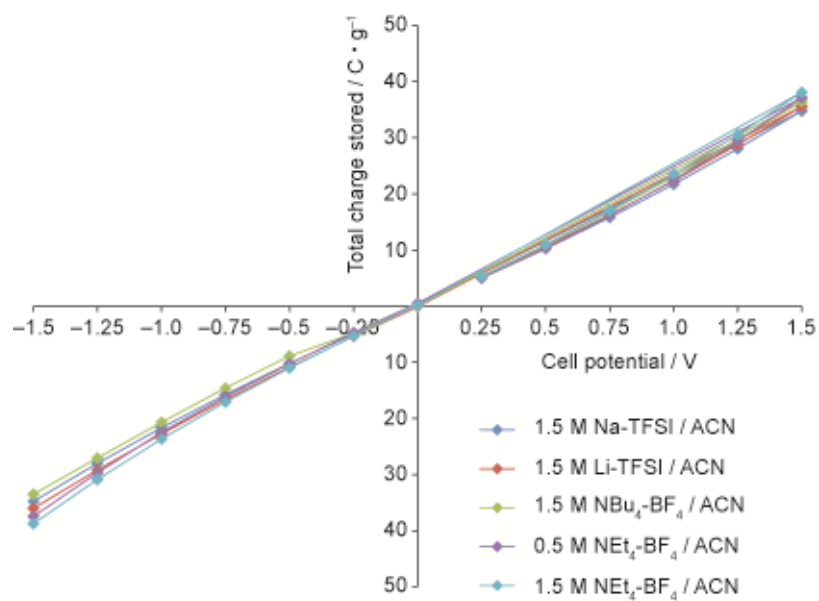

**Figure S3.** Plot showing cumulative charge stored as a function of voltage in supercapacitor bag cells used in *in situ* NMR experiments.
